# Supplementary material
Source: Research Square preprint supplement (doi:10.21203/rs.3.rs-9464936/v1)
Supplement: Supplementary file 1 [file c43248234ac11bc028920a91.pdf]

## **Supplementary Information for:**

Worldwide job losses due to natural hazards

### **Table of Contents**

#### **Supplementary Tables**

[Supplementary Table A1: JEL from hazards by country](#)

[Supplementary Table A2: JEL from heat by country](#)

[Supplementary Table A3: Share of JEL from hazards by country](#)

[Supplementary Table A4: JEL from hazards \(% Employed Population\)](#)

[Supplementary Table A5: Share JEL by household income categories by country](#)

#### **Supplementary Figures**

[Supplementary Figure A1: Regional share of JEL from hazards by income categories](#)

[Supplementary Supplementary Figure A: JEL from 1-in-100-year hazard, top 10 countries](#)

**Supplementary Table A1: JEL from disasters by country**

| Name          | Region | Income Group | JEL      |
|---------------|--------|--------------|----------|
| India         | SAR    | LMICs        | -1249000 |
| China         | EAP    | UMICs        | -1211200 |
| Myanmar       | EAP    | LMICs        | -678600  |
| DRC           | SSA    | LICs         | -557500  |
| Indonesia     | EAP    | UMICs        | -545500  |
| Haiti         | NA-LAC | LMICs        | -495900  |
| Bangladesh    | SAR    | LMICs        | -443700  |
| Pakistan      | MNA    | LMICs        | -360100  |
| Tanzania      | SSA    | LMICs        | -246700  |
| Viet Nam      | EAP    | LMICs        | -220800  |
| Nigeria       | SSA    | LMICs        | -211700  |
| Philippines   | EAP    | LMICs        | -209700  |
| Iran          | MNA    | UMICs        | -197500  |
| Ukraine       | ECA    | UMICs        | -163400  |
| Nepal         | SAR    | LMICs        | -135100  |
| Niger         | SSA    | LICs         | -124400  |
| Sudan         | SSA    | LICs         | -116500  |
| Uganda        | SSA    | LICs         | -104400  |
| Italy         | ECA    | HICs         | -97200   |
| Mexico        | NA-LAC | UMICs        | -93700   |
| Turkiye       | ECA    | UMICs        | -92700   |
| Brazil        | NA-LAC | UMICs        | -82900   |
| Japan         | EAP    | HICs         | -82700   |
| Zambia        | SSA    | LMICs        | -81700   |
| Colombia      | NA-LAC | UMICs        | -78400   |
| Madagascar    | SSA    | LICs         | -73900   |
| Russia        | ECA    | HICs         | -73900   |
| United States | NA-LAC | HICs         | -73800   |
| Ethiopia      | SSA    | LICs         | -70000   |
| Uzbekistan    | ECA    | LMICs        | -61600   |
| Honduras      | NA-LAC | LMICs        | -60100   |
| Peru          | NA-LAC | UMICs        | -57400   |
| Lao PDR       | EAP    | LMICs        | -52700   |
| Morocco       | MNA    | LMICs        | -52700   |
| Ecuador       | NA-LAC | UMICs        | -52700   |
| Burundi       | SSA    | LICs         | -52200   |
| Congo, Rep.   | SSA    | LMICs        | -49300   |
| Kenya         | SSA    | LMICs        | -46500   |
| Greece        | ECA    | HICs         | -40100   |
| Mozambique    | SSA    | LICs         | -36100   |
| Guatemala     | NA-LAC | UMICs        | -33100   |
| Chile         | NA-LAC | HICs         | -29600   |

|                |        |       |        |
|----------------|--------|-------|--------|
| Sri Lanka      | SAR    | LMICs | -25800 |
| Korea, Rep.    | EAP    | HICs  | -25500 |
| Algeria        | MNA    | UMICs | -23400 |
| UK             | ECA    | HICs  | -22500 |
| Cameroon       | SSA    | LMICs | -22300 |
| Argentina      | NA-LAC | UMICs | -20300 |
| Liberia        | SSA    | LICs  | -20000 |
| Kazakhstan     | ECA    | UMICs | -18800 |
| Chad           | SSA    | LICs  | -18600 |
| Angola         | SSA    | LMICs | -17900 |
| Lebanon        | MNA    | LMICs | -17200 |
| Serbia         | ECA    | UMICs | -16400 |
| Dominican Rep. | NA-LAC | UMICs | -15300 |
| Tajikistan     | ECA    | LMICs | -14200 |
| Georgia        | ECA    | UMICs | -12700 |
| Rwanda         | SSA    | LICs  | -12500 |
| Albania        | ECA    | UMICs | -12400 |
| Mali           | SSA    | LICs  | -12200 |
| Cote d'Ivoire  | SSA    | LMICs | -12000 |
| Benin          | SSA    | LMICs | -11100 |
| South Africa   | SSA    | UMICs | -10900 |
| Spain          | ECA    | HICs  | -10900 |
| Nicaragua      | NA-LAC | LMICs | -10700 |
| France         | ECA    | HICs  | -10600 |
| Zimbabwe       | SSA    | LMICs | -9900  |
| Malawi         | SSA    | LICs  | -9600  |
| Guinea         | SSA    | LMICs | -8800  |
| Romania        | ECA    | HICs  | -8800  |
| El Salvador    | NA-LAC | UMICs | -8700  |
| Bolivia        | NA-LAC | LMICs | -8500  |
| Azerbaijan     | ECA    | UMICs | -6900  |
| Armenia        | ECA    | UMICs | -6900  |
| Bhutan         | SAR    | LMICs | -6800  |
| Australia      | EAP    | HICs  | -6800  |
| Canada         | NA-LAC | HICs  | -6800  |
| Iraq           | MNA    | UMICs | -6600  |
| Paraguay       | NA-LAC | UMICs | -6600  |
| Ghana          | SSA    | LMICs | -6500  |
| Germany        | ECA    | HICs  | -6500  |
| Mauritania     | SSA    | LMICs | -6400  |
| Egypt          | MNA    | LMICs | -6100  |
| Moldova        | ECA    | UMICs | -5900  |
| Jordan         | MNA    | LMICs | -4900  |
| Malaysia       | EAP    | UMICs | -4700  |
| Senegal        | SSA    | LMICs | -4600  |
| Hungary        | ECA    | HICs  | -4500  |

|                           |        |       |       |
|---------------------------|--------|-------|-------|
| Tunisia                   | MNA    | LMICs | -4300 |
| Belarus                   | ECA    | UMICs | -4100 |
| Belgium                   | ECA    | HICs  | -3800 |
| Togo                      | SSA    | LICs  | -3800 |
| Croatia                   | ECA    | HICs  | -3700 |
| Burkina Faso              | SSA    | LICs  | -3600 |
| Netherlands               | ECA    | HICs  | -3200 |
| Austria                   | ECA    | HICs  | -2900 |
| Mongolia                  | EAP    | UMICs | -2900 |
| Slovak Republic           | ECA    | HICs  | -2900 |
| Sierra Leone              | SSA    | LICs  | -2700 |
| Comoros                   | SSA    | LMICs | -2700 |
| Lesotho                   | SSA    | LMICs | -2600 |
| Panama                    | NA-LAC | HICs  | -2400 |
| Israel                    | MNA    | HICs  | -2400 |
| Poland                    | ECA    | HICs  | -2300 |
| Portugal                  | ECA    | HICs  | -2200 |
| Czechia                   | ECA    | HICs  | -2200 |
| Bulgaria                  | ECA    | HICs  | -2000 |
| Slovenia                  | ECA    | HICs  | -1800 |
| Costa Rica                | NA-LAC | HICs  | -1700 |
| Belize                    | NA-LAC | UMICs | -1700 |
| Bosnia and<br>Herzegovina | ECA    | UMICs | -1700 |
| North Macedonia           | ECA    | UMICs | -1600 |
| Cyprus                    | ECA    | HICs  | -1100 |
| Switzerland               | ECA    | HICs  | -1100 |
| Mauritius                 | SSA    | UMICs | -1000 |
| Latvia                    | ECA    | HICs  | -1000 |
| Gabon                     | SSA    | UMICs | -900  |
| Botswana                  | SSA    | UMICs | -700  |
| Uruguay                   | NA-LAC | HICs  | -600  |
| Namibia                   | SSA    | LMICs | -500  |
| Montenegro                | ECA    | UMICs | -400  |
| Gambia, The               | SSA    | LICs  | -300  |
| Eswatini                  | SSA    | LMICs | -300  |
| Sweden                    | ECA    | HICs  | -300  |
| Finland                   | ECA    | HICs  | -200  |
| Lithuania                 | ECA    | HICs  | -200  |
| Iceland                   | ECA    | HICs  | -200  |
| Ireland                   | ECA    | HICs  | -200  |
| Denmark                   | ECA    | HICs  | -200  |
| Malta                     | MNA    | HICs  | -200  |
| Estonia                   | ECA    | HICs  | -100  |
| Norway                    | ECA    | HICs  | -100  |

---

*NB: Rounded JEL numbers*

**Supplementary Table A2: JEL from heat by country**

| Name          | Region | Income Group | JEL       |
|---------------|--------|--------------|-----------|
| India         | SAR    | LMICs        | -28336600 |
| China         | EAP    | UMICs        | -6463200  |
| DRC           | SSA    | LICs         | -5026400  |
| Pakistan      | MNA    | LMICs        | -4909900  |
| Nigeria       | SSA    | LMICs        | -3821200  |
| Liberia       | SSA    | LICs         | -2955100  |
| Viet Nam      | EAP    | LMICs        | -2566200  |
| Philippines   | EAP    | LMICs        | -2466700  |
| Bangladesh    | SAR    | LMICs        | -2414500  |
| Sudan         | SSA    | LICs         | -2337500  |
| Indonesia     | EAP    | UMICs        | -2004500  |
| Mali          | SSA    | LICs         | -1717400  |
| Tanzania      | SSA    | LMICs        | -1565500  |
| Myanmar       | EAP    | LMICs        | -1530600  |
| Cote d'Ivoire | SSA    | LMICs        | -902600   |
| Burkina Faso  | SSA    | LICs         | -856200   |
|               | NA-    |              |           |
| United States | LAC    | HICs         | -774100   |
| Ghana         | SSA    | LMICs        | -721200   |
|               | NA-    |              |           |
| Brazil        | LAC    | UMICs        | -716200   |
| Uganda        | SSA    | LICs         | -707900   |
| Madagascar    | SSA    | LICs         | -569900   |
| Senegal       | SSA    | LMICs        | -490000   |
| Guinea        | SSA    | LMICs        | -440100   |
| Nepal         | SAR    | LMICs        | -403000   |
| Ethiopia      | SSA    | LICs         | -399000   |
| Benin         | SSA    | LMICs        | -398900   |
| Japan         | EAP    | HICs         | -373400   |
| Egypt         | MNA    | LMICs        | -362300   |
| Malaysia      | EAP    | UMICs        | -325400   |
| Malawi        | SSA    | LICs         | -233500   |
|               | NA-    |              |           |
| Mexico        | LAC    | UMICs        | -231100   |
| Lao PDR       | EAP    | LMICs        | -195000   |
| Iraq          | MNA    | UMICs        | -190300   |
|               | NA-    |              |           |
| Colombia      | LAC    | UMICs        | -170800   |
|               | NA-    |              |           |
| Honduras      | LAC    | LMICs        | -160900   |
| Zambia        | SSA    | LMICs        | -152000   |
| Angola        | SSA    | LMICs        | -146800   |

|                |     |       |         |
|----------------|-----|-------|---------|
|                | NA- |       |         |
| Bolivia        | LAC | LMICs | -144900 |
| Kenya          | SSA | LMICs | -138400 |
| Sri Lanka      | SAR | LMICs | -122200 |
| Korea, Rep.    | EAP | HICs  | -107200 |
|                | NA- |       |         |
| Guatemala      | LAC | UMICs | -105100 |
|                | NA- |       |         |
| Ecuador        | LAC | UMICs | -98700  |
| Uzbekistan     | ECA | LMICs | -71100  |
| Burundi        | SSA | LICs  | -68900  |
| Turkiye        | ECA | UMICs | -63800  |
|                | NA- |       |         |
| Nicaragua      | LAC | LMICs | -62800  |
|                | NA- |       |         |
| Peru           | LAC | UMICs | -56100  |
|                | NA- |       |         |
| El Salvador    | LAC | UMICs | -55300  |
|                | NA- |       |         |
| Paraguay       | LAC | UMICs | -51100  |
|                | NA- |       |         |
| Dominican Rep. | LAC | UMICs | -43700  |
|                | NA- |       |         |
| Argentina      | LAC | UMICs | -42300  |
| Congo, Rep.    | SSA | LMICs | -40400  |
| Gambia, The    | SSA | LICs  | -35500  |
| Tunisia        | MNA | LMICs | -34100  |
| Spain          | ECA | HICs  | -31600  |
| South Africa   | SSA | UMICs | -25600  |
|                | NA- |       |         |
| Panama         | LAC | HICs  | -22700  |
| Italy          | ECA | HICs  | -21600  |
| Romania        | ECA | HICs  | -16100  |
| Russia         | ECA | HICs  | -15900  |
| Comoros        | SSA | LMICs | -14700  |
| Jordan         | MNA | LMICs | -14500  |
| Israel         | MNA | HICs  | -13900  |
| Ukraine        | ECA | UMICs | -12300  |
| Rwanda         | SSA | LICs  | -11200  |
| Tajikistan     | ECA | LMICs | -10900  |
| France         | ECA | HICs  | -10800  |
|                | NA- |       |         |
| Costa Rica     | LAC | HICs  | -10500  |
| Germany        | ECA | HICs  | -8100   |
|                | NA- |       |         |
| Canada         | LAC | HICs  | -7200   |
| Lebanon        | MNA | LMICs | -6100   |

|                           |     |       |       |
|---------------------------|-----|-------|-------|
| Hungary                   | ECA | HICs  | -5700 |
| Namibia                   | SSA | LMICs | -5700 |
| Greece                    | ECA | HICs  | -5400 |
|                           | NA- |       |       |
| Belize                    | LAC | UMICs | -4000 |
| Botswana                  | SSA | UMICs | -3900 |
| Moldova                   | ECA | UMICs | -3900 |
| Serbia                    | ECA | UMICs | -3600 |
| Albania                   | ECA | UMICs | -3100 |
| Bhutan                    | SAR | LMICs | -3000 |
| Mauritius                 | SSA | UMICs | -2800 |
| Poland                    | ECA | HICs  | -2500 |
| Cyprus                    | ECA | HICs  | -2400 |
| Eswatini                  | SSA | LMICs | -2300 |
|                           | NA- |       |       |
| Uruguay                   | LAC | HICs  | -2300 |
|                           | NA- |       |       |
| Chile                     | LAC | HICs  | -1900 |
| Portugal                  | ECA | HICs  | -1900 |
| Bosnia and<br>Herzegovina | ECA | UMICs | -1800 |
| Austria                   | ECA | HICs  | -1500 |
| Bulgaria                  | ECA | HICs  | -1500 |
| UK                        | ECA | HICs  | -1100 |
| Slovak Republic           | ECA | HICs  | -1000 |
| Czechia                   | ECA | HICs  | -900  |
| Switzerland               | ECA | HICs  | -800  |
| Lesotho                   | SSA | LMICs | -800  |
| Belgium                   | ECA | HICs  | -700  |
| Netherlands               | ECA | HICs  | -700  |
| Armenia                   | ECA | UMICs | -600  |
| Slovenia                  | ECA | HICs  | -500  |
| North Macedonia           | ECA | UMICs | -400  |
| Malta                     | MNA | HICs  | -400  |
| Mongolia                  | EAP | UMICs | -300  |
| Denmark                   | ECA | HICs  | -100  |
| Finland                   | ECA | HICs  | -100  |
| Lithuania                 | ECA | HICs  | -100  |
| Latvia                    | ECA | HICs  | -100  |
| Montenegro                | ECA | UMICs | -100  |
| Sweden                    | ECA | HICs  | -100  |
| Estonia                   | ECA | HICs  | 0     |
|                           | NA- |       |       |
| Haiti                     | LAC | LMICs | 0     |
| Ireland                   | ECA | HICs  | 0     |
| Iceland                   | ECA | HICs  | 0     |

|        |     |      |   |
|--------|-----|------|---|
| Norway | ECA | HICs | 0 |
|--------|-----|------|---|

---

*NB: Rounded JEL numbers*

**Supplementary Table A3: Share of JEL from hazards by country**

| Name                   | Earthquake | Flood | Storm surge | Tsunami | Wind |
|------------------------|------------|-------|-------------|---------|------|
| Angola                 | 0.59       | 0.41  | 0.00        | 0.00    | 0.00 |
| Albania                | 0.46       | 0.52  | 0.00        | 0.02    | 0.00 |
| Argentina              | 0.65       | 0.35  | 0.00        | 0.00    | 0.00 |
| Armenia                | 0.70       | 0.30  | 0.00        | 0.00    | 0.00 |
| Australia              | 0.26       | 0.17  | 0.04        | 0.29    | 0.24 |
| Austria                | 0.99       | 0.01  | 0.00        | 0.00    | 0.00 |
| Azerbaijan             | 0.94       | 0.06  | 0.00        | 0.00    | 0.00 |
| Burundi                | 0.88       | 0.12  | 0.00        | 0.00    | 0.00 |
| Belgium                | 0.98       | 0.02  | 0.00        | 0.00    | 0.00 |
| Benin                  | 0.16       | 0.84  | 0.00        | 0.00    | 0.00 |
| Burkina Faso           | 0.11       | 0.89  | 0.00        | 0.00    | 0.00 |
| Bangladesh             | 0.25       | 0.61  | 0.07        | 0.01    | 0.06 |
| Bulgaria               | 0.72       | 0.28  | 0.00        | 0.00    | 0.00 |
| Bosnia and Herzegovina | 0.34       | 0.66  | 0.00        | 0.00    | 0.00 |
| Belarus                | 0.03       | 0.97  | 0.00        | 0.00    | 0.00 |
| Belize                 | 0.06       | 0.71  | 0.16        | 0.00    | 0.08 |
| Bolivia                | 0.43       | 0.57  | 0.00        | 0.00    | 0.00 |
| Brazil                 | 0.11       | 0.89  | 0.00        | 0.00    | 0.00 |
| Bhutan                 | 0.18       | 0.82  | 0.00        | 0.00    | 0.00 |
| Botswana               | 0.59       | 0.41  | 0.00        | 0.00    | 0.00 |
| Canada                 | 0.57       | 0.30  | 0.00        | 0.13    | 0.00 |
| Switzerland            | 0.89       | 0.11  | 0.00        | 0.00    | 0.00 |
| Chile                  | 0.90       | 0.07  | 0.00        | 0.03    | 0.00 |
| China                  | 0.49       | 0.30  | 0.07        | 0.03    | 0.11 |
| Cote d'Ivoire          | 0.17       | 0.83  | 0.00        | 0.00    | 0.00 |
| Cameroon               | 0.52       | 0.48  | 0.00        | 0.00    | 0.00 |
| DRC                    | 0.24       | 0.76  | 0.00        | 0.00    | 0.00 |
| Congo, Rep.            | 0.03       | 0.97  | 0.00        | 0.00    | 0.00 |
| Colombia               | 0.75       | 0.23  | 0.00        | 0.00    | 0.01 |
| Comoros                | 0.33       | 0.00  | 0.08        | 0.40    | 0.19 |
| Costa Rica             | 0.44       | 0.32  | 0.00        | 0.04    | 0.19 |
| Cyprus                 | 0.83       | 0.00  | 0.00        | 0.17    | 0.00 |
| Czechia                | 0.80       | 0.20  | 0.00        | 0.00    | 0.00 |
| Germany                | 0.94       | 0.06  | 0.00        | 0.00    | 0.00 |
| Denmark                | 0.90       | 0.10  | 0.00        | 0.00    | 0.00 |
| Dominican Rep.         | 0.31       | 0.05  | 0.06        | 0.17    | 0.42 |
| Algeria                | 0.89       | 0.10  | 0.00        | 0.00    | 0.00 |
| Ecuador                | 0.62       | 0.36  | 0.00        | 0.02    | 0.00 |

|             |      |      |      |      |      |
|-------------|------|------|------|------|------|
| Egypt       | 0.74 | 0.10 | 0.00 | 0.15 | 0.00 |
| Spain       | 0.70 | 0.17 | 0.00 | 0.12 | 0.00 |
| Estonia     | 0.75 | 0.25 | 0.00 | 0.00 | 0.00 |
| Ethiopia    | 0.39 | 0.61 | 0.00 | 0.00 | 0.00 |
| Finland     | 1.00 | 0.00 | 0.00 | 0.00 | 0.00 |
| France      | 0.71 | 0.12 | 0.07 | 0.05 | 0.05 |
| Gabon       | 0.08 | 0.92 | 0.00 | 0.00 | 0.00 |
| UK          | 0.96 | 0.02 | 0.00 | 0.02 | 0.00 |
| Georgia     | 0.88 | 0.12 | 0.00 | 0.00 | 0.00 |
| Ghana       | 0.32 | 0.68 | 0.00 | 0.00 | 0.00 |
| Guinea      | 0.10 | 0.90 | 0.00 | 0.00 | 0.00 |
| Gambia, The | 0.18 | 0.81 | 0.00 | 0.01 | 0.00 |
| Greece      | 0.96 | 0.02 | 0.00 | 0.02 | 0.00 |
| Guatemala   | 0.45 | 0.44 | 0.01 | 0.01 | 0.08 |
| Honduras    | 0.50 | 0.32 | 0.13 | 0.00 | 0.05 |
| Croatia     | 0.88 | 0.11 | 0.00 | 0.00 | 0.00 |
| Haiti       | 0.23 | 0.19 | 0.52 | 0.01 | 0.04 |
| Hungary     | 0.56 | 0.44 | 0.00 | 0.00 | 0.00 |
| Indonesia   | 0.53 | 0.17 | 0.00 | 0.28 | 0.01 |
| India       | 0.41 | 0.38 | 0.01 | 0.04 | 0.16 |
| Ireland     | 0.84 | 0.10 | 0.00 | 0.06 | 0.00 |
| Iran        | 0.66 | 0.33 | 0.00 | 0.00 | 0.00 |
| Iraq        | 0.72 | 0.28 | 0.00 | 0.00 | 0.00 |
| Iceland     | 1.00 | 0.00 | 0.00 | 0.00 | 0.00 |
| Israel      | 0.96 | 0.01 | 0.00 | 0.03 | 0.00 |
| Italy       | 0.93 | 0.02 | 0.00 | 0.05 | 0.00 |
| Jordan      | 0.97 | 0.03 | 0.00 | 0.00 | 0.00 |
| Japan       | 0.38 | 0.00 | 0.00 | 0.26 | 0.35 |
| Kazakhstan  | 0.50 | 0.50 | 0.00 | 0.00 | 0.00 |
| Kenya       | 0.39 | 0.51 | 0.00 | 0.10 | 0.00 |
| Korea, Rep. | 0.13 | 0.01 | 0.35 | 0.04 | 0.47 |
| Lao PDR     | 0.08 | 0.90 | 0.00 | 0.00 | 0.02 |
| Lebanon     | 0.84 | 0.00 | 0.00 | 0.16 | 0.00 |
| Liberia     | 0.16 | 0.83 | 0.00 | 0.00 | 0.00 |
| Sri Lanka   | 0.02 | 0.50 | 0.04 | 0.35 | 0.08 |
| Lesotho     | 0.59 | 0.41 | 0.00 | 0.00 | 0.00 |
| Lithuania   | 0.25 | 0.75 | 0.00 | 0.00 | 0.00 |
| Latvia      | 0.17 | 0.83 | 0.00 | 0.00 | 0.00 |
| Morocco     | 0.86 | 0.10 | 0.00 | 0.04 | 0.00 |
| Moldova     | 0.02 | 0.98 | 0.00 | 0.00 | 0.00 |
| Madagascar  | 0.05 | 0.66 | 0.04 | 0.02 | 0.22 |
| Mexico      | 0.27 | 0.37 | 0.12 | 0.02 | 0.23 |
| North       |      |      |      |      |      |
| Macedonia   | 0.72 | 0.28 | 0.00 | 0.00 | 0.00 |
| Mali        | 0.10 | 0.90 | 0.00 | 0.00 | 0.00 |
| Malta       | 1.00 | 0.00 | 0.00 | 0.00 | 0.00 |

|              |      |      |      |      |      |
|--------------|------|------|------|------|------|
| Myanmar      | 0.08 | 0.88 | 0.00 | 0.01 | 0.03 |
| Montenegro   | 0.45 | 0.54 | 0.00 | 0.01 | 0.00 |
| Mongolia     | 0.11 | 0.89 | 0.00 | 0.00 | 0.00 |
| Mozambique   | 0.54 | 0.30 | 0.04 | 0.05 | 0.07 |
| Mauritania   | 0.10 | 0.90 | 0.00 | 0.00 | 0.00 |
| Mauritius    | 0.00 | 0.00 | 0.44 | 0.24 | 0.33 |
| Malawi       | 0.70 | 0.30 | 0.00 | 0.00 | 0.00 |
| Malaysia     | 0.15 | 0.73 | 0.00 | 0.05 | 0.07 |
| Namibia      | 0.36 | 0.64 | 0.00 | 0.00 | 0.00 |
| Niger        | 0.00 | 1.00 | 0.00 | 0.00 | 0.00 |
| Nigeria      | 0.23 | 0.77 | 0.00 | 0.00 | 0.00 |
| Nicaragua    | 0.31 | 0.61 | 0.01 | 0.01 | 0.07 |
| Netherlands  | 1.00 | 0.00 | 0.00 | 0.00 | 0.00 |
| Norway       | 1.00 | 0.00 | 0.00 | 0.00 | 0.00 |
| Nepal        | 0.13 | 0.87 | 0.00 | 0.00 | 0.00 |
| Pakistan     | 0.45 | 0.53 | 0.01 | 0.00 | 0.01 |
| Panama       | 0.62 | 0.25 | 0.00 | 0.06 | 0.07 |
| Peru         | 0.88 | 0.09 | 0.00 | 0.03 | 0.00 |
| Philippines  | 0.44 | 0.20 | 0.13 | 0.09 | 0.14 |
| Poland       | 0.92 | 0.08 | 0.00 | 0.00 | 0.00 |
| Portugal     | 0.61 | 0.29 | 0.00 | 0.10 | 0.00 |
| Paraguay     | 0.06 | 0.94 | 0.00 | 0.00 | 0.00 |
| Romania      | 0.56 | 0.44 | 0.00 | 0.00 | 0.00 |
| Russia       | 0.46 | 0.54 | 0.00 | 0.00 | 0.00 |
| Rwanda       | 0.81 | 0.19 | 0.00 | 0.00 | 0.00 |
| Sudan        | 0.12 | 0.88 | 0.00 | 0.00 | 0.00 |
| Senegal      | 0.38 | 0.53 | 0.00 | 0.09 | 0.00 |
| Sierra Leone | 0.11 | 0.89 | 0.00 | 0.00 | 0.00 |
| El Salvador  | 0.52 | 0.30 | 0.01 | 0.10 | 0.07 |
| Serbia       | 0.33 | 0.67 | 0.00 | 0.00 | 0.00 |
| Slovak       |      |      |      |      |      |
| Republic     | 0.66 | 0.34 | 0.00 | 0.00 | 0.00 |
| Slovenia     | 0.92 | 0.08 | 0.00 | 0.00 | 0.00 |
| Sweden       | 0.85 | 0.15 | 0.00 | 0.00 | 0.00 |
| Eswatini     | 0.52 | 0.48 | 0.00 | 0.00 | 0.00 |
| Chad         | 0.04 | 0.96 | 0.00 | 0.00 | 0.00 |
| Togo         | 0.16 | 0.84 | 0.00 | 0.00 | 0.00 |
| Tajikistan   | 0.39 | 0.61 | 0.00 | 0.00 | 0.00 |
| Tunisia      | 0.90 | 0.04 | 0.00 | 0.06 | 0.00 |
| Türkiye      | 0.92 | 0.08 | 0.00 | 0.01 | 0.00 |
| Tanzania     | 0.69 | 0.25 | 0.00 | 0.06 | 0.00 |
| Uganda       | 0.73 | 0.27 | 0.00 | 0.00 | 0.00 |
| Ukraine      | 0.04 | 0.96 | 0.00 | 0.00 | 0.00 |
| Uruguay      | 0.47 | 0.53 | 0.00 | 0.00 | 0.00 |
| United       |      |      |      |      |      |
| States       | 0.50 | 0.01 | 0.01 | 0.04 | 0.44 |

|              |      |      |      |      |      |
|--------------|------|------|------|------|------|
| Uzbekistan   | 0.67 | 0.33 | 0.00 | 0.00 | 0.00 |
| Viet Nam     | 0.04 | 0.81 | 0.06 | 0.01 | 0.08 |
| South Africa | 0.92 | 0.04 | 0.00 | 0.04 | 0.00 |
| Zambia       | 0.82 | 0.18 | 0.00 | 0.00 | 0.00 |
| Zimbabwe     | 0.23 | 0.77 | 0.00 | 0.00 | 0.00 |

---

---

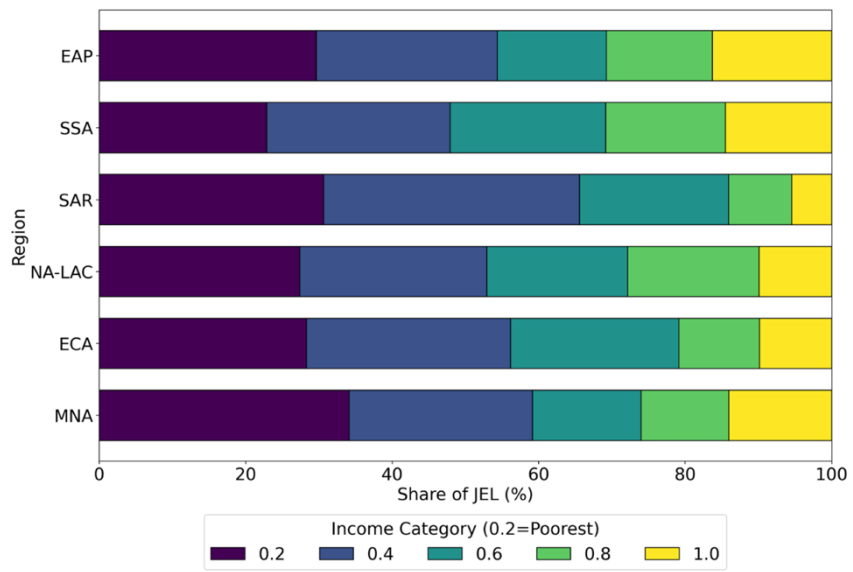

**Supplementary Figure A1: Regional share of JEL from hazards by income categories**

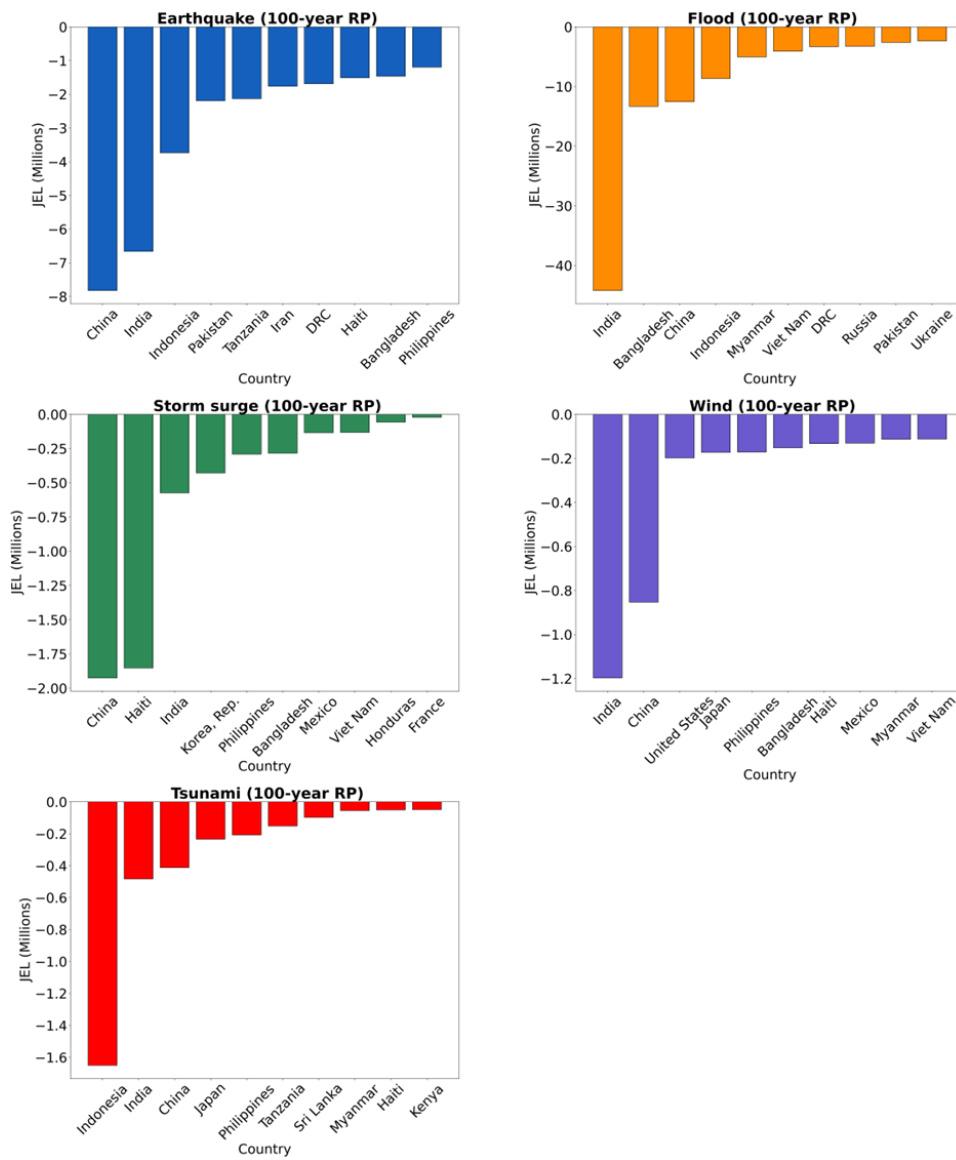

Supplementary Figure A2: JEL from 1-in-100-year hazard, top 10 countries

**Supplementary Table A4: JEL from hazards (% Employed Population)**

| Name        | Region | Income Group | JEL (% Employed Population) |
|-------------|--------|--------------|-----------------------------|
|             | NA-    |              |                             |
| Haiti       | LAC    | LMICs        | 7.59%                       |
| Myanmar     | EAP    | LMICs        | 2.36%                       |
| Congo, Rep. | SSA    | LMICs        | 1.48%                       |
| Nepal       | SAR    | LMICs        | 1.31%                       |
| Bhutan      | SAR    | LMICs        | 1.31%                       |
| Lao PDR     | EAP    | LMICs        | 1.08%                       |
|             | NA-    |              |                             |
| Honduras    | LAC    | LMICs        | 0.97%                       |
| Greece      | ECA    | HICs         | 0.90%                       |
| Albania     | ECA    | UMICs        | 0.88%                       |
| Ukraine     | ECA    | UMICs        | 0.88%                       |
| DRC         | SSA    | LICs         | 0.82%                       |
| Lebanon     | MNA    | LMICs        | 0.74%                       |
|             | NA-    |              |                             |
| Belize      | LAC    | UMICs        | 0.73%                       |
| Sudan       | SSA    | LICs         | 0.68%                       |
| Zambia      | SSA    | LMICs        | 0.67%                       |
| Comoros     | SSA    | LMICs        | 0.65%                       |
| Georgia     | ECA    | UMICs        | 0.64%                       |
| Niger       | SSA    | LICs         | 0.64%                       |
| Iran        | MNA    | UMICs        | 0.58%                       |
| Serbia      | ECA    | UMICs        | 0.49%                       |
| Liberia     | SSA    | LICs         | 0.48%                       |
| Burundi     | SSA    | LICs         | 0.48%                       |
|             | NA-    |              |                             |
| Ecuador     | LAC    | UMICs        | 0.47%                       |
| Tanzania    | SSA    | LMICs        | 0.44%                       |
| Bangladesh  | SAR    | LMICs        | 0.44%                       |
| Armenia     | ECA    | UMICs        | 0.42%                       |
| Italy       | ECA    | HICs         | 0.38%                       |
| Tajikistan  | ECA    | LMICs        | 0.37%                       |
| Moldova     | ECA    | UMICs        | 0.34%                       |
| Morocco     | MNA    | LMICs        | 0.34%                       |
| Mauritania  | SSA    | LMICs        | 0.34%                       |
| Philippines | EAP    | LMICs        | 0.33%                       |
| Uzbekistan  | ECA    | LMICs        | 0.32%                       |
|             | NA-    |              |                             |
| Guatemala   | LAC    | UMICs        | 0.32%                       |
| Viet Nam    | EAP    | LMICs        | 0.30%                       |

|                        |     |       |       |
|------------------------|-----|-------|-------|
| Indonesia              | EAP | UMICs | 0.30% |
| Pakistan               | MNA | LMICs | 0.29% |
|                        | NA- |       |       |
| Chile                  | LAC | HICs  | 0.29% |
| Madagascar             | SSA | LICs  | 0.28% |
| Uganda                 | SSA | LICs  | 0.27% |
|                        | NA- |       |       |
| Colombia               | LAC | UMICs | 0.27% |
|                        | NA- |       |       |
| Nicaragua              | LAC | LMICs | 0.25% |
| Sri Lanka              | SAR | LMICs | 0.25% |
|                        | NA- |       |       |
| Peru                   | LAC | UMICs | 0.25% |
|                        | NA- |       |       |
| El Salvador            | LAC | UMICs | 0.24% |
| Turkiye                | ECA | UMICs | 0.24% |
| Lesotho                | SSA | LMICs | 0.24% |
|                        | NA- |       |       |
| Dominican Rep.         | LAC | UMICs | 0.23% |
| North Macedonia        | ECA | UMICs | 0.20% |
| Croatia                | ECA | HICs  | 0.20% |
| Rwanda                 | SSA | LICs  | 0.18% |
| India                  | SAR | LMICs | 0.18% |
| Montenegro             | ECA | UMICs | 0.17% |
| Mauritius              | SSA | UMICs | 0.16% |
| Chad                   | SSA | LICs  | 0.16% |
| Slovenia               | ECA | HICs  | 0.15% |
| Mongolia               | EAP | UMICs | 0.15% |
| Algeria                | MNA | UMICs | 0.14% |
|                        | NA- |       |       |
| Paraguay               | LAC | UMICs | 0.14% |
| Mozambique             | SSA | LICs  | 0.14% |
| Jordan                 | MNA | LMICs | 0.14% |
| China                  | EAP | UMICs | 0.13% |
| Kazakhstan             | ECA | UMICs | 0.13% |
| Cyprus                 | ECA | HICs  | 0.13% |
| Kenya                  | SSA | LMICs | 0.13% |
| Bosnia and Herzegovina | ECA | UMICs | 0.13% |
|                        | NA- |       |       |
| Mexico                 | LAC | UMICs | 0.12% |
| Cameroon               | SSA | LMICs | 0.12% |
| Guinea                 | SSA | LMICs | 0.12% |
| Nigeria                | SSA | LMICs | 0.12% |
| Azerbaijan             | ECA | UMICs | 0.12% |
| Japan                  | EAP | HICs  | 0.11% |
| Benin                  | SSA | LMICs | 0.10% |
| Zimbabwe               | SSA | LMICs | 0.10% |

|                 |     |       |       |
|-----------------|-----|-------|-------|
|                 | NA- |       |       |
| Panama          | LAC | HICs  | 0.10% |
| Slovak Republic | ECA | HICs  | 0.09% |
| Latvia          | ECA | HICs  | 0.09% |
| Gabon           | SSA | UMICs | 0.09% |
|                 | NA- |       |       |
| Bolivia         | LAC | LMICs | 0.09% |
| Romania         | ECA | HICs  | 0.09% |
| Tunisia         | MNA | LMICs | 0.09% |
| Russia          | ECA | HICs  | 0.09% |
| Eswatini        | SSA | LMICs | 0.09% |
| Hungary         | ECA | HICs  | 0.08% |
| Korea, Rep.     | EAP | HICs  | 0.08% |
| Ethiopia        | SSA | LICs  | 0.08% |
|                 | NA- |       |       |
| Argentina       | LAC | UMICs | 0.08% |
| Iceland         | ECA | HICs  | 0.08% |
| Mali            | SSA | LICs  | 0.08% |
| Belarus         | ECA | UMICs | 0.07% |
| Angola          | SSA | LMICs | 0.07% |
|                 | NA- |       |       |
| Brazil          | LAC | UMICs | 0.07% |
| Togo            | SSA | LICs  | 0.07% |
| Malawi          | SSA | LICs  | 0.07% |
| Belgium         | ECA | HICs  | 0.06% |
|                 | NA- |       |       |
| Costa Rica      | LAC | HICs  | 0.06% |
| Sierra Leone    | SSA | LICs  | 0.06% |
| Bulgaria        | ECA | HICs  | 0.06% |
| Cote d'Ivoire   | SSA | LMICs | 0.06% |
| Austria         | ECA | HICs  | 0.06% |
| UK              | ECA | HICs  | 0.06% |
| Botswana        | SSA | UMICs | 0.05% |
| Senegal         | SSA | LMICs | 0.05% |
| South Africa    | SSA | UMICs | 0.05% |
| Spain           | ECA | HICs  | 0.05% |
| Malta           | MNA | HICs  | 0.04% |
| Iraq            | MNA | UMICs | 0.04% |
| Australia       | EAP | HICs  | 0.04% |
| Israel          | MNA | HICs  | 0.04% |
| Portugal        | ECA | HICs  | 0.04% |
|                 | NA- |       |       |
| United States   | LAC | HICs  | 0.04% |
| Namibia         | SSA | LMICs | 0.04% |
| Czechia         | ECA | HICs  | 0.03% |
| Burkina Faso    | SSA | LICs  | 0.03% |

|             |     |       |       |
|-------------|-----|-------|-------|
|             | NA- |       |       |
| Uruguay     | LAC | HICs  | 0.03% |
| Ghana       | SSA | LMICs | 0.03% |
| France      | ECA | HICs  | 0.03% |
| Netherlands | ECA | HICs  | 0.03% |
| Gambia, The | SSA | LICs  | 0.03% |
|             | NA- |       |       |
| Canada      | LAC | HICs  | 0.03% |
| Malaysia    | EAP | UMICs | 0.02% |
| Switzerland | ECA | HICs  | 0.02% |
| Lithuania   | ECA | HICs  | 0.01% |
| Germany     | ECA | HICs  | 0.01% |
| Estonia     | ECA | HICs  | 0.01% |
| Egypt       | MNA | LMICs | 0.01% |
| Poland      | ECA | HICs  | 0.01% |
| Finland     | ECA | HICs  | 0.01% |
| Ireland     | ECA | HICs  | 0.01% |
| Denmark     | ECA | HICs  | 0.01% |
| Sweden      | ECA | HICs  | 0.00% |
| Norway      | ECA | HICs  | 0.00% |

---

**Supplementary Table A5: Share JEL by household income categories by country**

| Name                      | 0.2<br>(poorest 20%) | 0.4  | 0.6  | 0.8  | 1.0<br>(richest 20%) |
|---------------------------|----------------------|------|------|------|----------------------|
| Angola                    | 0.35                 | 0.36 | 0.16 | 0.06 | 0.06                 |
| Albania                   | 0.43                 | 0.26 | 0.21 | 0.07 | 0.03                 |
| Argentina                 | 0.10                 | 0.07 | 0.07 | 0.22 | 0.54                 |
| Armenia                   | 0.16                 | 0.44 | 0.33 | 0.05 | 0.03                 |
| Australia                 | 0.31                 | 0.26 | 0.28 | 0.08 | 0.07                 |
| Austria                   | 0.29                 | 0.40 | 0.11 | 0.14 | 0.07                 |
| Azerbaijan                | 0.51                 | 0.39 | 0.03 | 0.02 | 0.04                 |
| Burundi                   | 0.18                 | 0.21 | 0.22 | 0.21 | 0.18                 |
| Belgium                   | 0.26                 | 0.54 | 0.10 | 0.08 | 0.02                 |
| Benin                     | 0.23                 | 0.26 | 0.23 | 0.15 | 0.14                 |
| Burkina Faso              | 0.21                 | 0.22 | 0.25 | 0.13 | 0.19                 |
| Bangladesh                | 0.26                 | 0.31 | 0.21 | 0.15 | 0.07                 |
| Bulgaria                  | 0.45                 | 0.22 | 0.15 | 0.12 | 0.06                 |
| Bosnia and<br>Herzegovina | 0.26                 | 0.37 | 0.22 | 0.07 | 0.08                 |
| Belarus                   | 0.34                 | 0.38 | 0.09 | 0.08 | 0.11                 |
| Belize                    | 0.17                 | 0.25 | 0.32 | 0.20 | 0.07                 |
| Bolivia                   | 0.21                 | 0.29 | 0.16 | 0.16 | 0.19                 |
| Brazil                    | 0.21                 | 0.14 | 0.15 | 0.19 | 0.31                 |
| Bhutan                    | 0.23                 | 0.19 | 0.18 | 0.19 | 0.21                 |
| Botswana                  | 0.25                 | 0.39 | 0.19 | 0.08 | 0.10                 |
| Canada                    | 0.26                 | 0.18 | 0.20 | 0.24 | 0.13                 |
| Switzerland               | 0.29                 | 0.16 | 0.18 | 0.24 | 0.14                 |
| Chile                     | 0.26                 | 0.18 | 0.20 | 0.20 | 0.16                 |
| China                     | 0.36                 | 0.22 | 0.13 | 0.13 | 0.16                 |
| Cote d'Ivoire             | 0.24                 | 0.27 | 0.22 | 0.14 | 0.13                 |
| Cameroon                  | 0.33                 | 0.40 | 0.15 | 0.06 | 0.06                 |
| DRC                       | 0.19                 | 0.21 | 0.22 | 0.20 | 0.19                 |
| Congo, Rep.               | 0.36                 | 0.40 | 0.09 | 0.08 | 0.07                 |
| Colombia                  | 0.41                 | 0.34 | 0.09 | 0.07 | 0.09                 |
| Comoros                   | 0.25                 | 0.27 | 0.18 | 0.16 | 0.15                 |
| Costa Rica                | 0.16                 | 0.28 | 0.22 | 0.18 | 0.16                 |
| Cyprus                    | 0.47                 | 0.14 | 0.15 | 0.17 | 0.07                 |
| Czechia                   | 0.50                 | 0.16 | 0.15 | 0.14 | 0.05                 |
| Germany                   | 0.32                 | 0.16 | 0.18 | 0.23 | 0.12                 |
| Denmark                   | 0.35                 | 0.22 | 0.14 | 0.17 | 0.12                 |
| Dominican Rep.            | 0.29                 | 0.20 | 0.22 | 0.16 | 0.13                 |
| Algeria                   | 0.40                 | 0.40 | 0.10 | 0.05 | 0.05                 |
| Ecuador                   | 0.34                 | 0.21 | 0.19 | 0.15 | 0.11                 |
| Egypt                     | 0.35                 | 0.18 | 0.17 | 0.15 | 0.16                 |
| Spain                     | 0.23                 | 0.46 | 0.16 | 0.08 | 0.06                 |
| Estonia                   | 0.41                 | 0.18 | 0.16 | 0.19 | 0.06                 |

|                 |      |      |      |      |      |
|-----------------|------|------|------|------|------|
| Ethiopia        | 0.19 | 0.18 | 0.19 | 0.21 | 0.23 |
| Finland         | 0.44 | 0.15 | 0.17 | 0.20 | 0.03 |
| France          | 0.42 | 0.28 | 0.14 | 0.10 | 0.07 |
| Gabon           | 0.24 | 0.30 | 0.15 | 0.15 | 0.16 |
| UK              | 0.22 | 0.41 | 0.26 | 0.07 | 0.04 |
| Georgia         | 0.01 | 0.14 | 0.23 | 0.25 | 0.38 |
| Ghana           | 0.27 | 0.36 | 0.13 | 0.11 | 0.14 |
| Guinea          | 0.22 | 0.25 | 0.24 | 0.16 | 0.14 |
| Gambia, The     | 0.25 | 0.32 | 0.20 | 0.11 | 0.11 |
| Greece          | 0.29 | 0.15 | 0.17 | 0.19 | 0.19 |
| Guatemala       | 0.25 | 0.22 | 0.17 | 0.17 | 0.20 |
| Honduras        | 0.30 | 0.26 | 0.21 | 0.14 | 0.10 |
| Croatia         | 0.44 | 0.30 | 0.11 | 0.08 | 0.06 |
| Haiti           | 0.23 | 0.30 | 0.22 | 0.22 | 0.04 |
| Hungary         | 0.20 | 0.48 | 0.17 | 0.08 | 0.07 |
| Indonesia       | 0.35 | 0.30 | 0.15 | 0.11 | 0.09 |
| India           | 0.34 | 0.37 | 0.20 | 0.05 | 0.04 |
| Ireland         | 0.06 | 0.47 | 0.20 | 0.13 | 0.14 |
| Iran            | 0.32 | 0.08 | 0.11 | 0.16 | 0.32 |
| Iraq            | 0.50 | 0.19 | 0.13 | 0.10 | 0.08 |
| Iceland         | 0.13 | 0.23 | 0.25 | 0.29 | 0.11 |
| Israel          | 0.17 | 0.16 | 0.21 | 0.25 | 0.21 |
| Italy           | 0.36 | 0.36 | 0.12 | 0.12 | 0.04 |
| Jordan          | 0.16 | 0.23 | 0.46 | 0.07 | 0.07 |
| Japan           | 0.25 | 0.38 | 0.20 | 0.08 | 0.09 |
| Kazakhstan      | 0.28 | 0.38 | 0.21 | 0.10 | 0.03 |
| Kenya           | 0.25 | 0.26 | 0.17 | 0.16 | 0.15 |
| Korea, Rep.     | 0.46 | 0.18 | 0.12 | 0.14 | 0.09 |
| Lao PDR         | 0.36 | 0.33 | 0.19 | 0.06 | 0.06 |
| Lebanon         | 0.39 | 0.06 | 0.07 | 0.34 | 0.14 |
| Liberia         | 0.21 | 0.24 | 0.24 | 0.16 | 0.15 |
| Sri Lanka       | 0.27 | 0.21 | 0.18 | 0.17 | 0.18 |
| Lesotho         | 0.11 | 0.26 | 0.25 | 0.19 | 0.18 |
| Lithuania       | 0.13 | 0.35 | 0.16 | 0.19 | 0.17 |
| Latvia          | 0.37 | 0.21 | 0.12 | 0.15 | 0.15 |
| Morocco         | 0.40 | 0.39 | 0.11 | 0.05 | 0.06 |
| Moldova         | 0.26 | 0.32 | 0.20 | 0.13 | 0.09 |
| Madagascar      | 0.22 | 0.22 | 0.24 | 0.17 | 0.15 |
| Mexico          | 0.37 | 0.20 | 0.23 | 0.12 | 0.08 |
| North Macedonia | 0.30 | 0.24 | 0.16 | 0.19 | 0.11 |
| Mali            | 0.14 | 0.18 | 0.25 | 0.20 | 0.23 |
| Malta           | 0.45 | 0.41 | 0.07 | 0.05 | 0.01 |
| Myanmar         | 0.14 | 0.17 | 0.19 | 0.23 | 0.27 |
| Montenegro      | 0.40 | 0.30 | 0.11 | 0.10 | 0.08 |
| Mongolia        | 0.20 | 0.25 | 0.23 | 0.17 | 0.15 |
| Mozambique      | 0.25 | 0.27 | 0.24 | 0.14 | 0.10 |

|                 |      |      |      |      |      |
|-----------------|------|------|------|------|------|
| Mauritania      | 0.25 | 0.27 | 0.24 | 0.12 | 0.12 |
| Mauritius       | 0.33 | 0.35 | 0.09 | 0.11 | 0.13 |
| Malawi          | 0.14 | 0.22 | 0.25 | 0.18 | 0.21 |
| Malaysia        | 0.49 | 0.13 | 0.10 | 0.12 | 0.15 |
| Namibia         | 0.15 | 0.35 | 0.27 | 0.15 | 0.08 |
| Niger           | 0.19 | 0.20 | 0.18 | 0.22 | 0.20 |
| Nigeria         | 0.29 | 0.32 | 0.16 | 0.11 | 0.12 |
| Nicaragua       | 0.24 | 0.28 | 0.22 | 0.12 | 0.14 |
| Netherlands     | 0.23 | 0.49 | 0.19 | 0.08 | 0.01 |
| Norway          | 0.17 | 0.15 | 0.21 | 0.34 | 0.13 |
| Nepal           | 0.21 | 0.30 | 0.25 | 0.17 | 0.07 |
| Pakistan        | 0.34 | 0.32 | 0.18 | 0.10 | 0.06 |
| Panama          | 0.38 | 0.17 | 0.13 | 0.15 | 0.17 |
| Peru            | 0.45 | 0.25 | 0.14 | 0.08 | 0.08 |
| Philippines     | 0.25 | 0.24 | 0.15 | 0.17 | 0.19 |
| Poland          | 0.38 | 0.28 | 0.13 | 0.16 | 0.05 |
| Portugal        | 0.46 | 0.20 | 0.11 | 0.12 | 0.10 |
| Paraguay        | 0.35 | 0.38 | 0.11 | 0.08 | 0.09 |
| Romania         | 0.39 | 0.24 | 0.17 | 0.12 | 0.07 |
| Russia          | 0.33 | 0.33 | 0.20 | 0.09 | 0.04 |
| Rwanda          | 0.22 | 0.21 | 0.23 | 0.17 | 0.17 |
| Sudan           | 0.24 | 0.22 | 0.24 | 0.18 | 0.12 |
| Senegal         | 0.36 | 0.38 | 0.18 | 0.05 | 0.04 |
| Sierra Leone    | 0.22 | 0.23 | 0.24 | 0.16 | 0.14 |
| El Salvador     | 0.21 | 0.22 | 0.20 | 0.19 | 0.17 |
| Serbia          | 0.29 | 0.34 | 0.23 | 0.08 | 0.06 |
| Slovak Republic | 0.64 | 0.24 | 0.06 | 0.03 | 0.04 |
| Slovenia        | 0.37 | 0.18 | 0.18 | 0.20 | 0.07 |
| Sweden          | 0.36 | 0.19 | 0.16 | 0.21 | 0.08 |
| Eswatini        | 0.14 | 0.26 | 0.19 | 0.17 | 0.25 |
| Chad            | 0.13 | 0.16 | 0.20 | 0.23 | 0.28 |
| Togo            | 0.20 | 0.20 | 0.25 | 0.16 | 0.19 |
| Tajikistan      | 0.07 | 0.18 | 0.23 | 0.25 | 0.28 |
| Tunisia         | 0.38 | 0.39 | 0.11 | 0.06 | 0.06 |
| Turkiye         | 0.42 | 0.12 | 0.13 | 0.14 | 0.18 |
| Tanzania        | 0.26 | 0.28 | 0.25 | 0.14 | 0.06 |
| Uganda          | 0.23 | 0.29 | 0.23 | 0.16 | 0.09 |
| Ukraine         | 0.19 | 0.29 | 0.39 | 0.06 | 0.07 |
| Uruguay         | 0.41 | 0.32 | 0.12 | 0.07 | 0.08 |
| United States   | 0.25 | 0.18 | 0.22 | 0.26 | 0.09 |
| Uzbekistan      | 0.15 | 0.26 | 0.30 | 0.12 | 0.17 |
| Viet Nam        | 0.31 | 0.44 | 0.08 | 0.07 | 0.09 |
| South Africa    | 0.24 | 0.03 | 0.09 | 0.20 | 0.44 |
| Zambia          | 0.29 | 0.32 | 0.25 | 0.07 | 0.07 |
| Zimbabwe        | 0.12 | 0.30 | 0.23 | 0.18 | 0.17 |
